# Supplementary material
Source: PubMed Central journal article supplement (PMC8180135)

a

## BLM vs Normal

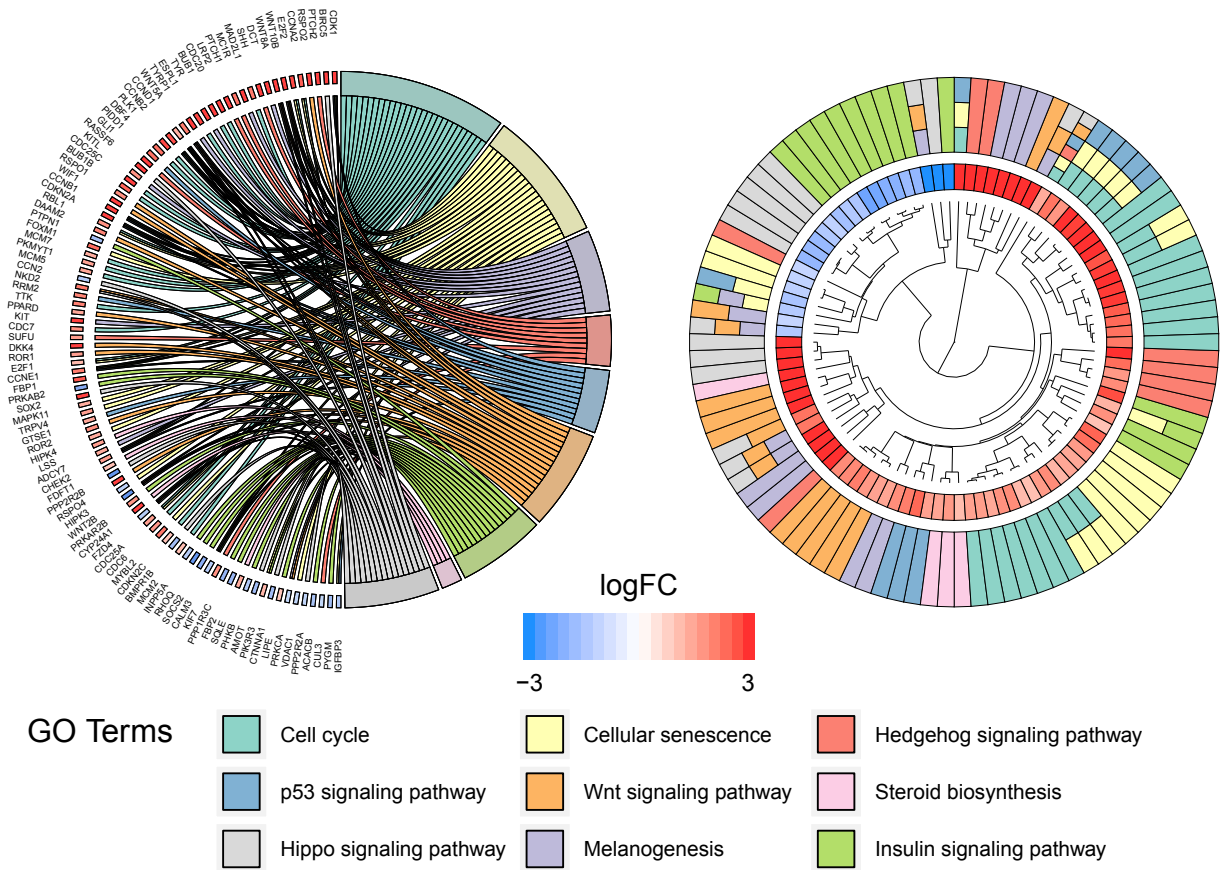

b

## EVs vs Normal

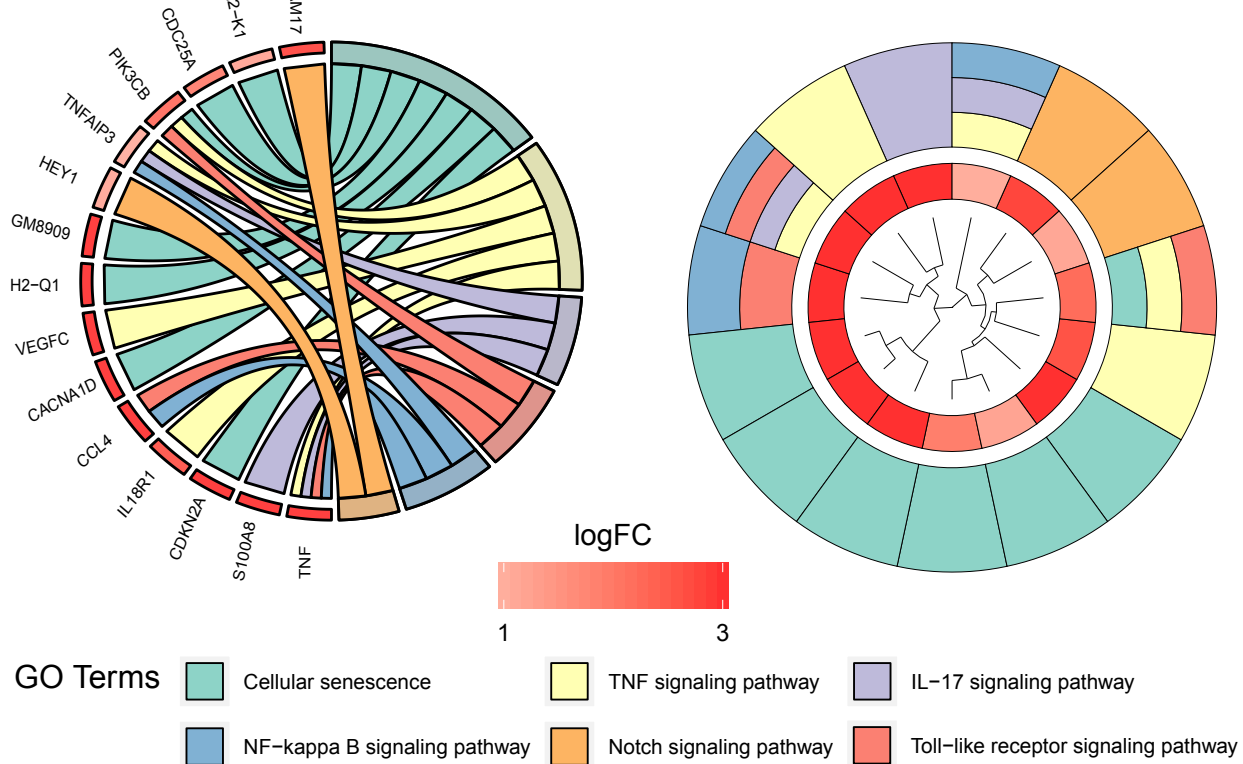

Supplement: 13287_2021_2400_MOESM1_ESM.pdf [file 13287_2021_2400_MOESM1_ESM.pdf]
