# Supplementary material
Source: PubMed Central journal article supplement (PMC8180135)

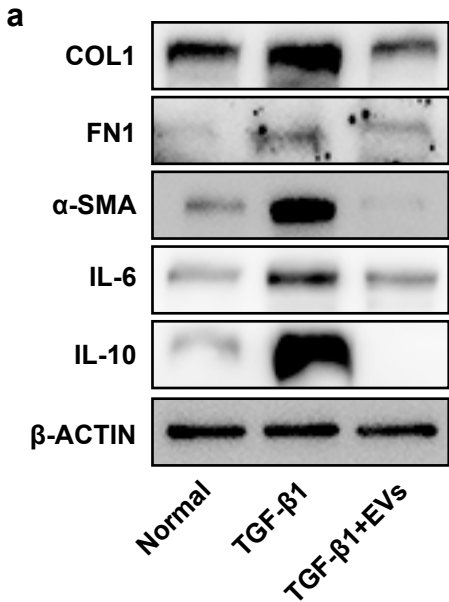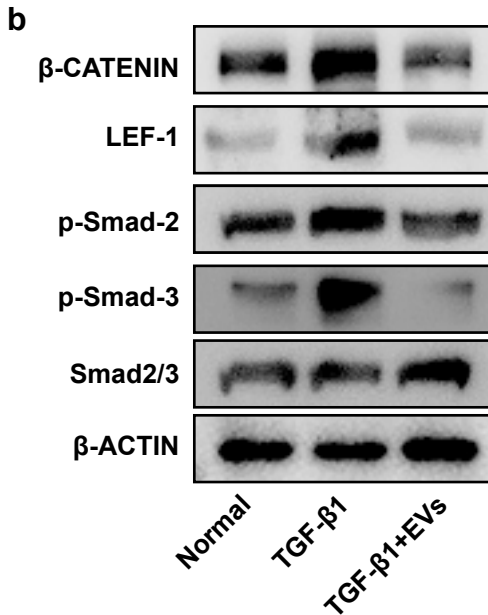

Supplement: 13287_2021_2400_MOESM2_ESM.pdf [file 13287_2021_2400_MOESM2_ESM.pdf]
